# Supplementary material for: Testing of symmetric biphasic stimulation in Vim-DBS ET patients: a randomized-controlled pilot study
Source: Frontiers journal article supplement (doi:10.3389/fneur.2024.1366227), 2024-04-24

## CONSORT 2010 Flow Diagram

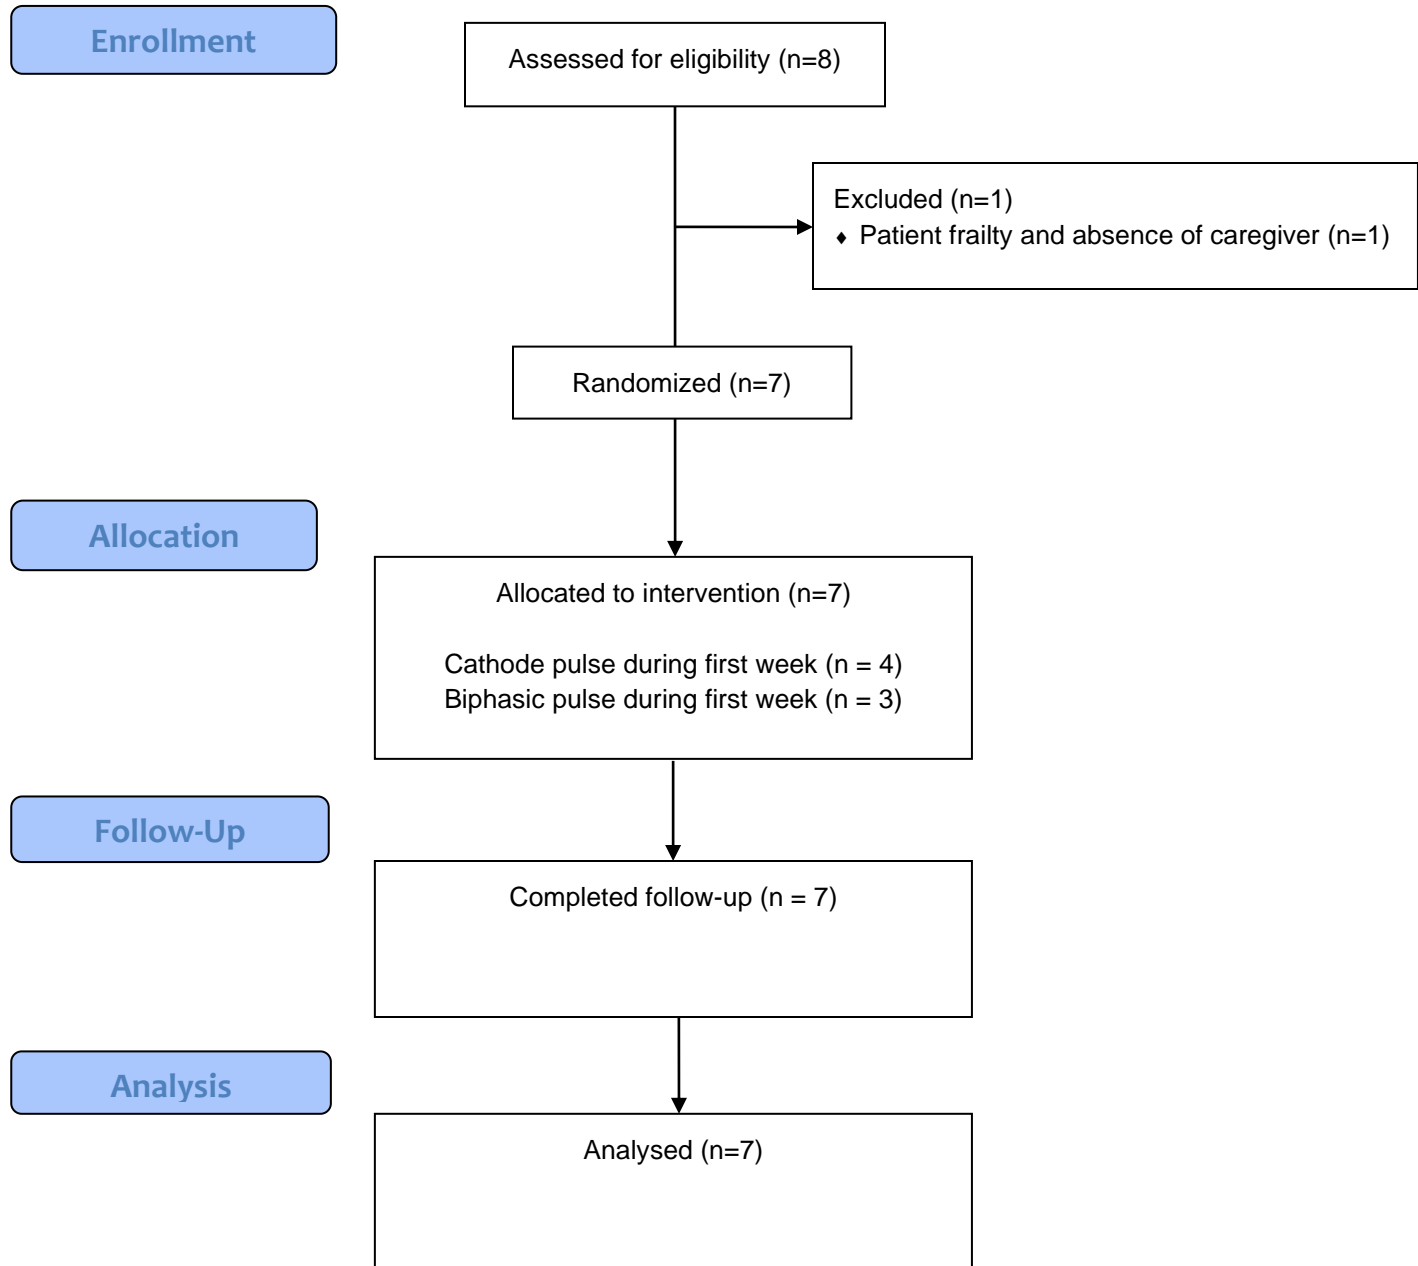

Supplement: Data_Sheet_1.PDF [file Data_Sheet_1.PDF]
