# Supplementary material for: Testing of symmetric biphasic stimulation in Vim-DBS ET patients: a randomized-controlled pilot study
Source: Frontiers journal article supplement (doi:10.3389/fneur.2024.1366227), 2024-04-24
Supplement: Image_1.PDF [file Image_1.PDF]

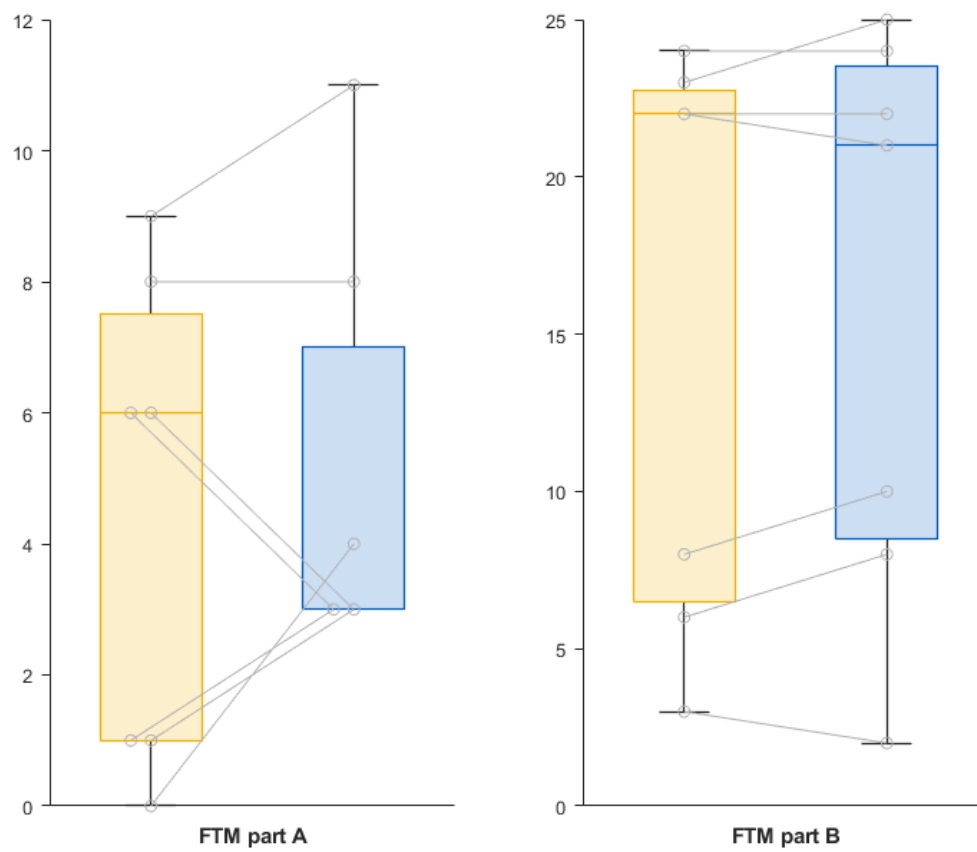

**Supplementary Figure 2:** Boxplots of the FTM subscores part A and B, after 1 week of cathodic and biphasic stimulation (n = 7). FTM = Fahn-Tolosa-Marin Tremor Rating Scale.
